# Supplementary figures and images for: An Attractor-Based Complexity Measurement for Boolean Recurrent Neural Networks
Source: PLOS journal article supplement (doi:10.1371/journal.pone.0094204), 2014-04-11

*a*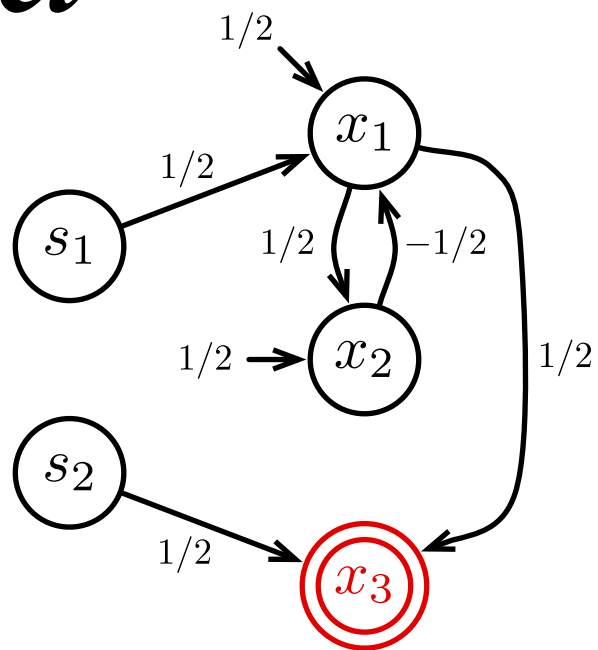*b*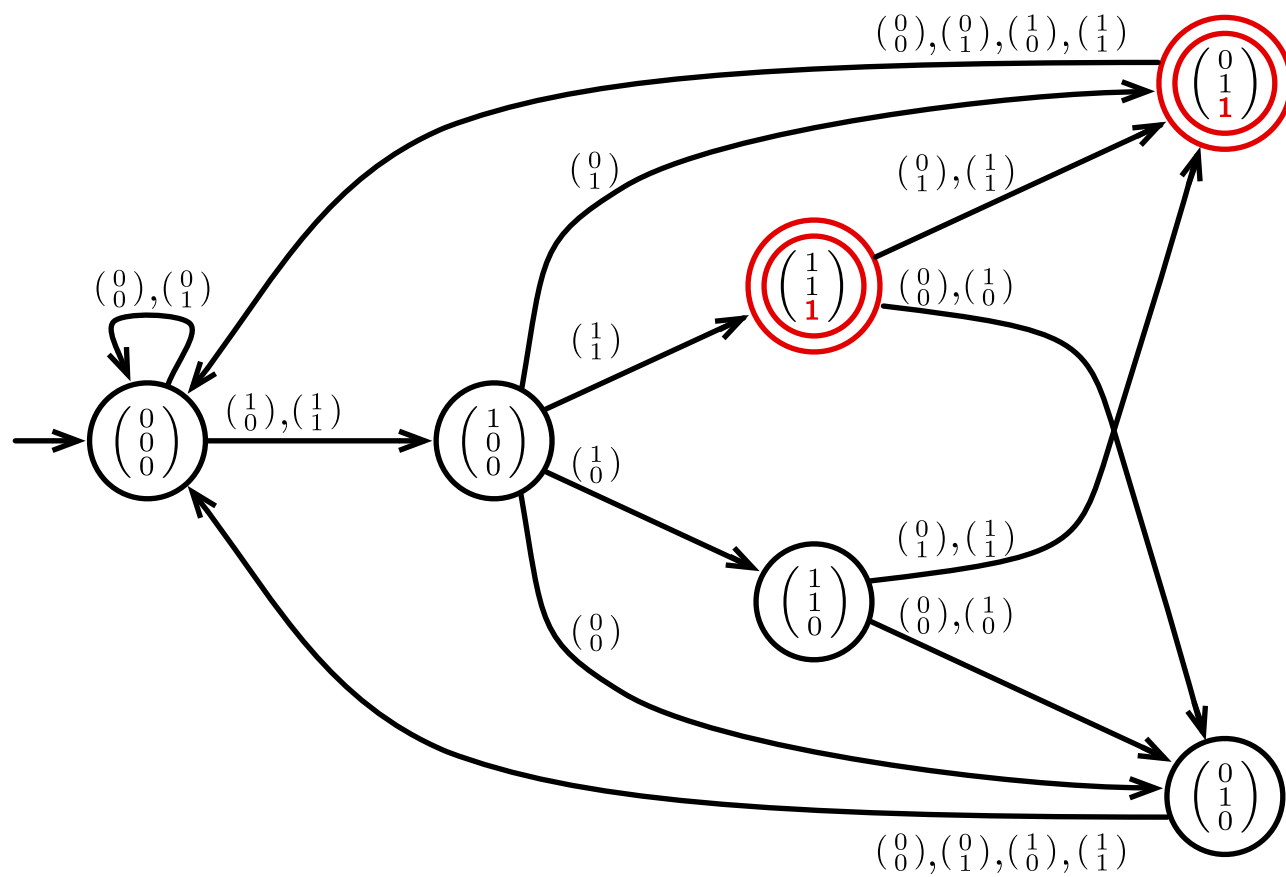*c*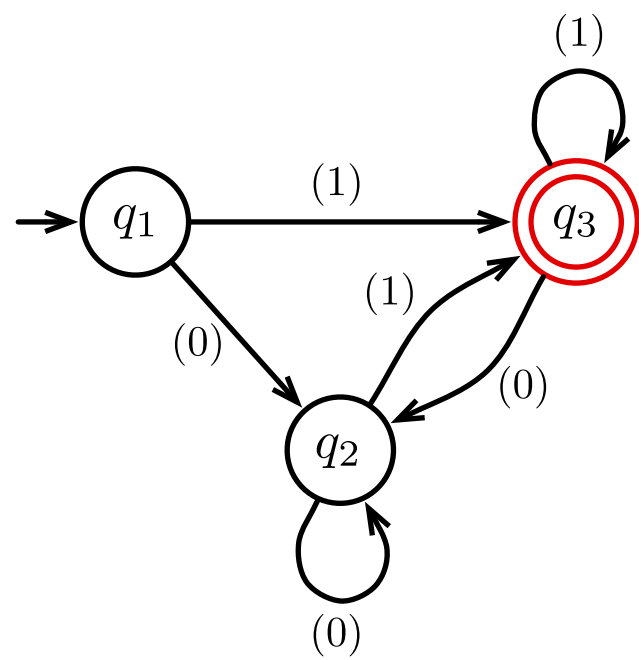*d*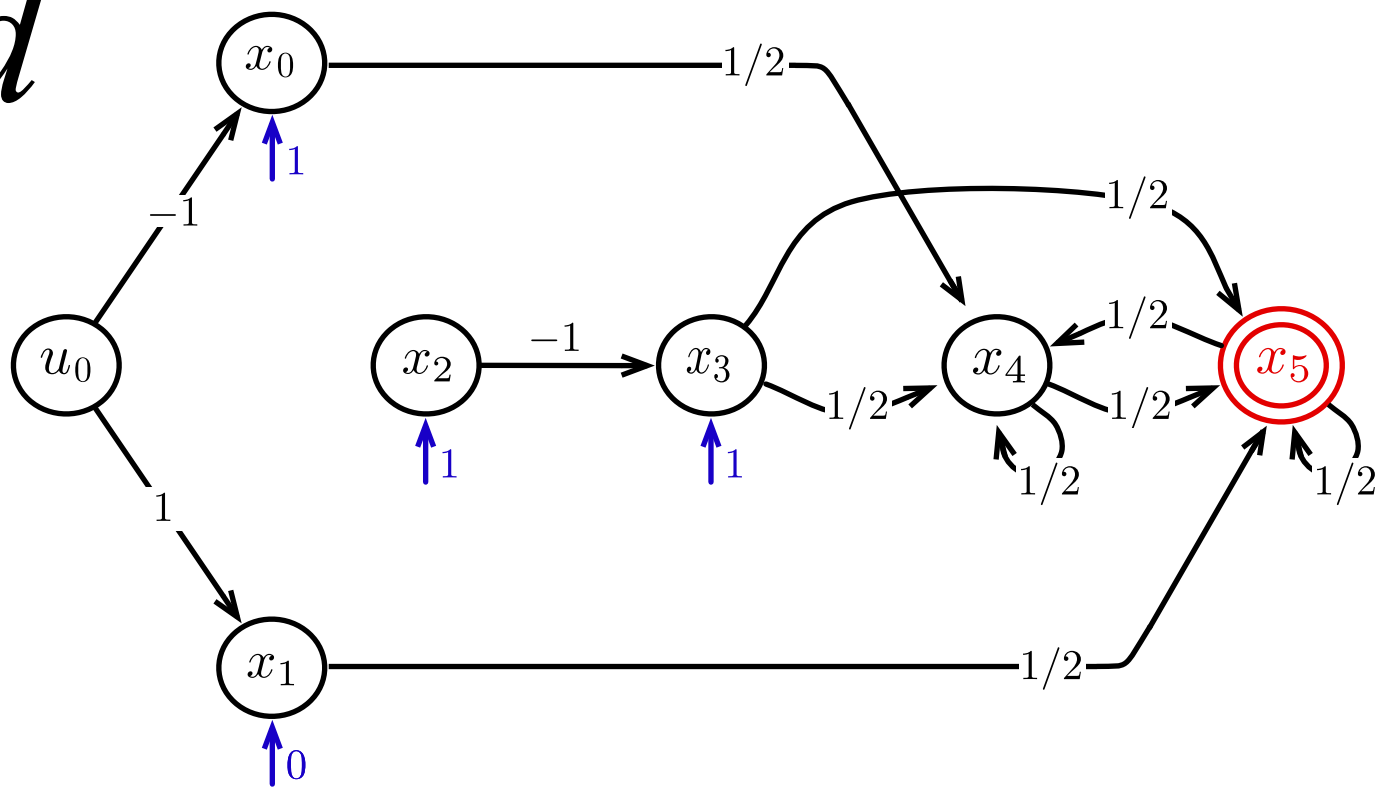

Supplement: S3 (10.1371/journal.pone.0094204.s003) [file journal.pone.0094204.s003]
